# Supplementary material for: Deficiencies in Chfr and Mlh1 synergistically enhance tumor susceptibility in mice
Source: JCI journal article supplement (doi:10.1172/jci37405), 2009-08-17

## Supplementary material:

### Supplementary Figure Legends:

**Supplementary Figure S1:** Validation of the specificity of anti-CHFR antibodies. (A) IHC analysis of HeLa (absence of CHFR expression), and HeLa cells that ectopically express HA-tagged CHFR. (B) Western blot analysis with cell lysates from T47D cells transduced with either CHFR retroviral shRNA or control vector using indicated antibodies.

**Supplementary Figure S2:** Oligonucleotide primers used for amplification and sequencing of *Chfr* in mouse tumors.

**Supplementary Figure S3:** Chromosomal aberrations of MEFs with *Chfr/Mlh1* deficiencies. (A) Spontaneous chromosomal aberrations were evaluated in MEFs with indicated genotypes. Two different MEF lines were used for each genotype (filled bars, MEF line1; open bars, MEF line2). Number of chromosomal aberrations per chromosome is presented. (B) DNA-damage-induced chromosomal aberrations were scored in MEFs with indicated genotypes. MEFs were treated with a low dose of ionizing radiation (IR) (1 Gy) and allowed to recover for 1 hour. Two different MEF lines were used for each genotype (filled bars, MEF line1; open bars, MEF line2). Number of chromosomal aberrations per chromosome is presented.

**Supplementary Figure S4:** Deficiency in *Chfr* sensitizes cells to antimicrotubule drug treatment. MEFs (*Chfr*<sup>+/+</sup>*Mlh1*<sup>+/+</sup>, *Chfr*<sup>-/-</sup>*Mlh1*<sup>+/+</sup>, *Chfr*<sup>+/+</sup>*Mlh1*<sup>-/-</sup>, and *Chfr*<sup>-/-</sup>*Mlh1*<sup>-/-</sup>) were treated with diluent (DMSO) or increasing concentration of either nocodazole (A and C) or MNNG (B and D). (A and B) Cell viabilities were assessed after 72h by MTS assay as described in “Methods”. (C and D) Apoptotic response to the treatments was determined by staining with FITC-Annexin V and PI binding, followed by flow cytometry. Two different MEF lines per genotype were analyzed for each concentration. Experiments were performed in triplicate. Each data point was calculated from three triplicate samples per treatment group for each MEF line. Bars, SD of triplicate samples. Representative experiment out of three is shown.

Figure S1

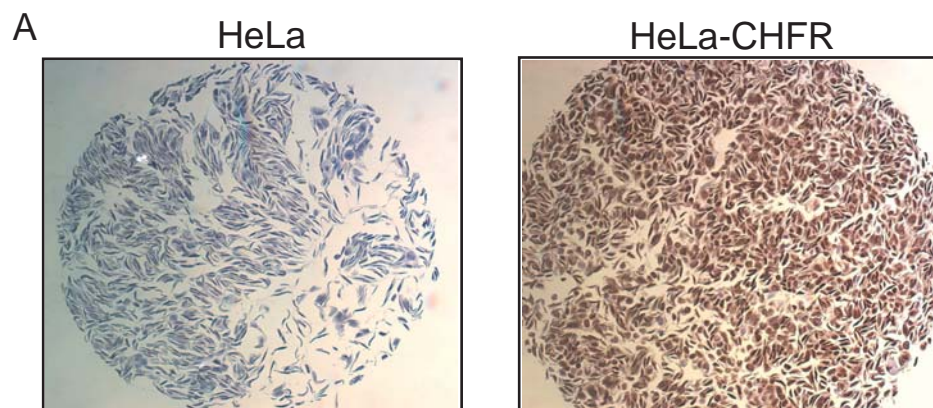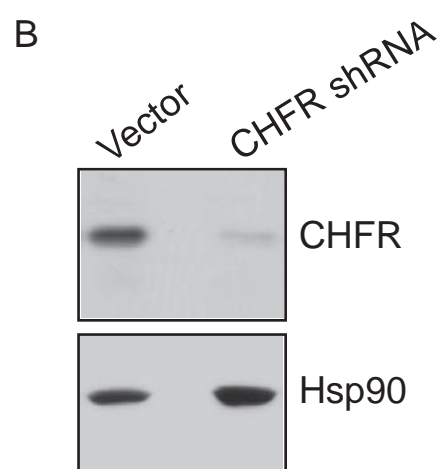

Figure S2

| Promoter/Exon<br>Covered | Nucleotide sequence        |                           | Product<br>size (bp) |
|--------------------------|----------------------------|---------------------------|----------------------|
|                          | Forward                    | Reverse                   |                      |
| promoter_1               | CGCTGTCAACAGACATCTCG       | GGCATTGTTTTTGCCAGTGT      | 595                  |
| promoter_2               | GCCCAGCCAATCACATTAGA       | TCGTCTCTGAGGGCTGATTT      | 598                  |
| Exon1-2                  | CCAATCACAGGGCGTACC         | CCCTGTCTACCCCTTTAGCC      | 447                  |
| Exon3                    | TTGGTCACCGACTGGAAAAG       | GCTGAGAAAACCATAAGCAGG     | 293                  |
| Exon4                    | CTGGGCAAATTTCTTAATATGG     | TCTTGGTGCAACACCTGG        | 270                  |
| Exon5                    | GAGTTGACTTCGCACTTCCC       | CCATCCTAGAACACAAAGCCC     | 178                  |
| Exon6                    | GAGTTGACTTCGCACTTCCC       | CAGAACTCACTGATGAATGG      | 534                  |
| Exon7                    | CATGGATGAGTAGATAAGACGTGC   | AACCTAGTGCAGGCAACAGC      | 378                  |
| Exon8                    | GAGAAATGTGAGGTCGTCCG       | ACACTTGTCAAGGGAGCCAG      | 289                  |
| Exon9                    | TCACAGTGGCAGATCTTTGG       | GATGATGGCTCAGGGCATAG      | 286                  |
| Exon10                   | AAAGGCCAAAACCTCAACACTG     | ACCCCATAGCACAGTGAAGC      | 302                  |
| Exon11                   | TGATATCTGCATGTCTGCCTG      | GGAAAATAGAACACAATCACAAGG  | 286                  |
| Exon12                   | TTGTCTGCTGTCTTTCACCTG      | CCACTCAGCTACGTCTCTATCC    | 285                  |
| Exon13                   | GCTCTTGAGTCTGGTGCTAAATG    | ACACAATCCAACACCACCG       | 254                  |
| Exon14                   | GGCAAACAAGTTTGATAAGATGC    | GAAACCACACAAGTTATAGGAAAGC | 209                  |
| Exon15                   | TCCCTGACTAGTTGAGTGGTTC     | CACTTCATAGGAACTAAGACACCC  | 227                  |
| Exon16                   | GGTGTTAGAAAATGACATTGCTTG   | CCATCCCAAGTGCCTGTTAG      | 240                  |
| Exon17                   | TCCTTTAGCTACATGAAAGGAATATG | TTACTCTTGTCTTCACAAGCCC    | 208                  |
| Exon18_1                 | CATGGGGCAATTACAGTGTG       | CCTATGAGCTTCCCATTTTAACC   | 488                  |
| Exon18_2                 | CTCCCTCCTGTGTGCTGAG        | GTTTCAGCAGGGAGTTGCTC      | 489                  |
| Exon18_3                 | TGGAAGAATGAGCATATGTTTCTG   | TGAAGACTCAGTGGTGCCTG      | 531                  |

Figure S3

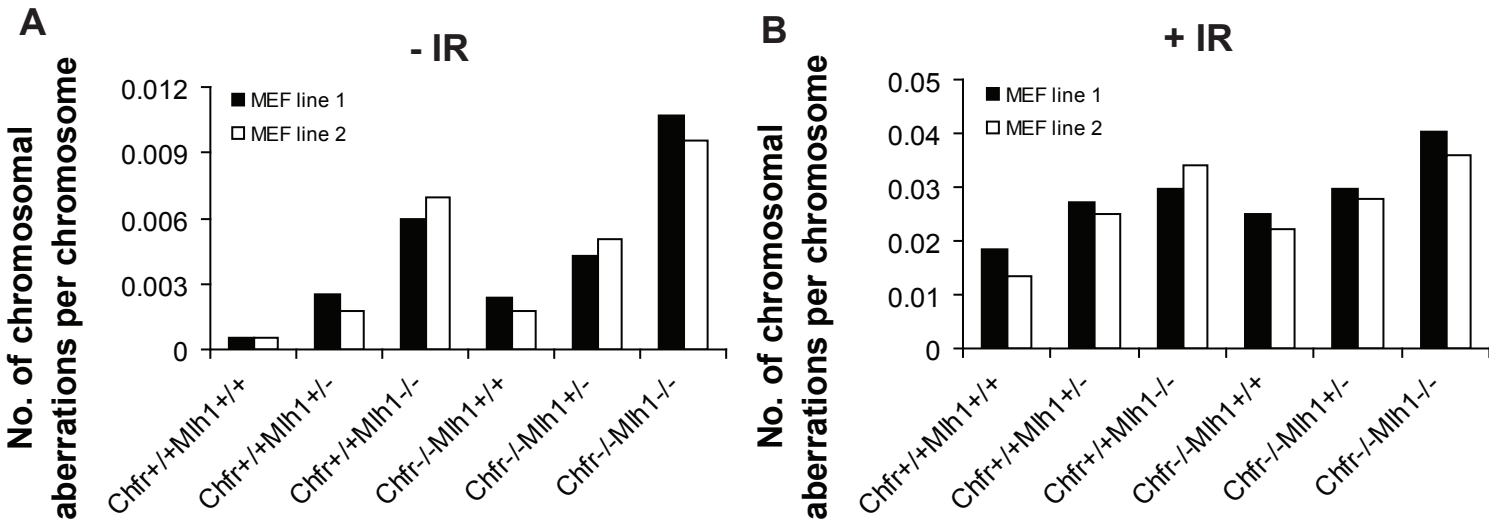

Figure S4

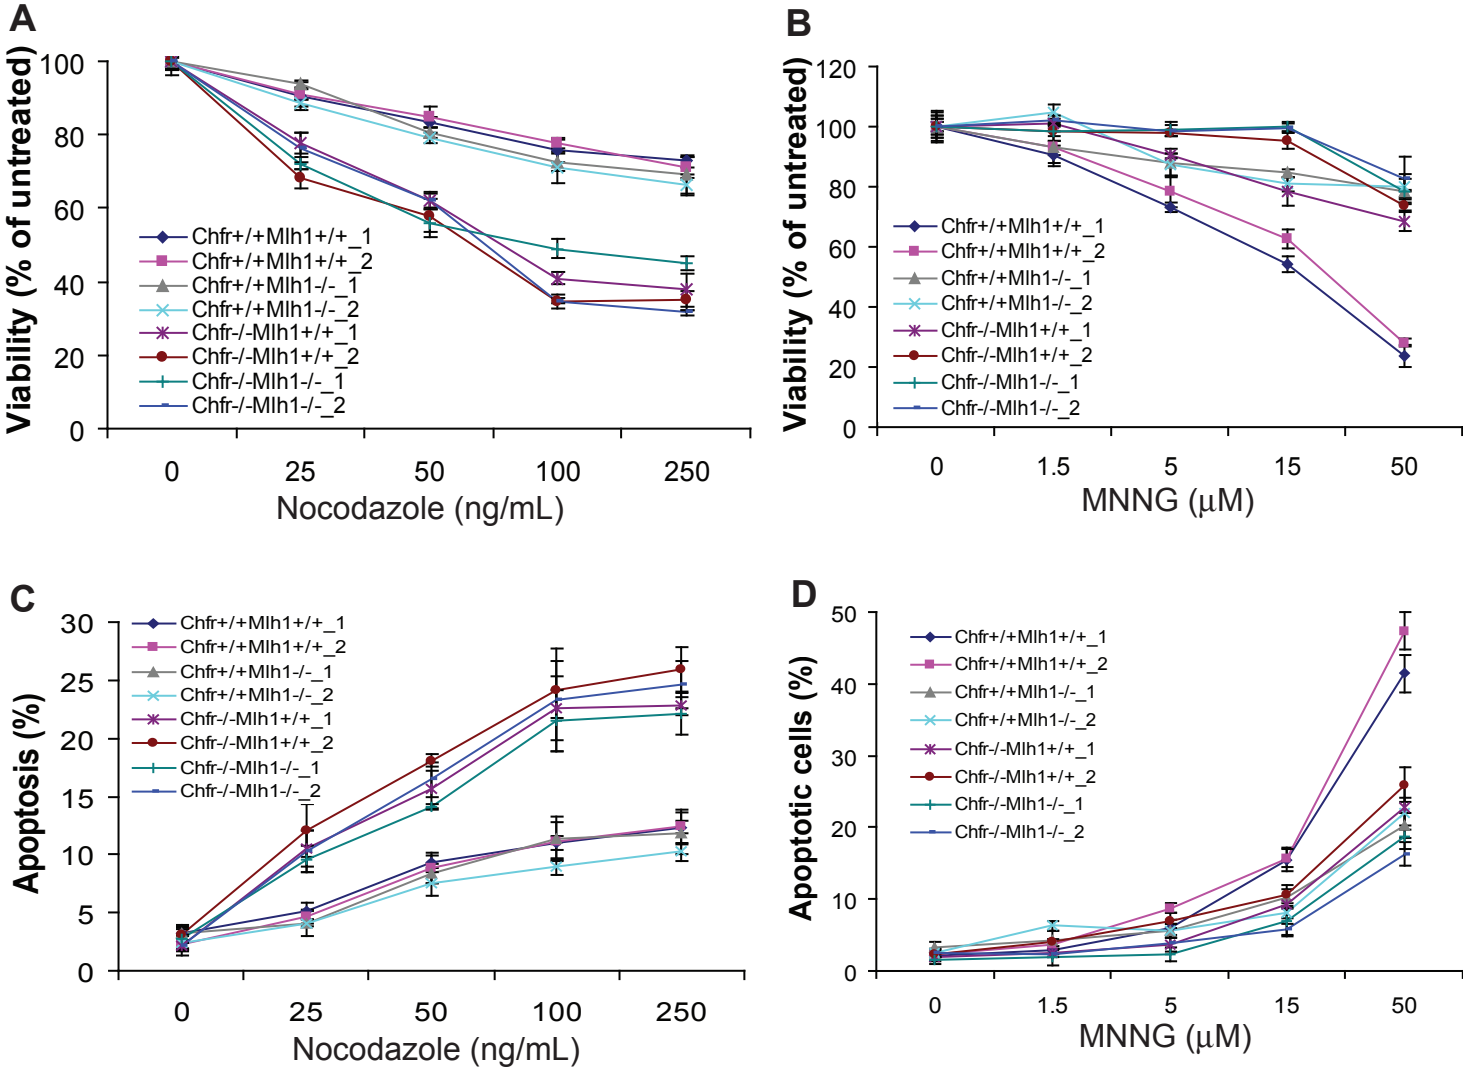

Supplement: sd1 [file 1]
